# Supplementary material for: Synthesis of Highly Efficient (0D/1D) Z-Scheme CdS-NPs@ZnO-NRs Visible-Light-Driven Photo(electro)catalyst for PEC Oxygen Evolution Reaction and Removal of Tetracycline
Source: MDPI journal article supplement (doi:10.3390/catal12121601), 2022-12-07
Supplement: s1 [file s1]

Supporting information

# Synthesis of Highly Efficient (0D/1D) Z-scheme CdS-NPs@ZnO-NRs Visible-light-driven Photo(electro)catalyst for PEC Oxygen Evolution Reaction and Removal of Tetracycline

Sridharan Balu <sup>1,2,§</sup>, Harikrishnan Venkatesvaran <sup>1,§</sup>, Kuo-Wei Lan <sup>1</sup>, and Thomas C.-K. Yang <sup>1,2,\*</sup>

<sup>1</sup>Department of Chemical Engineering and Biotechnology, National Taipei University of Technology, Taipei-106, Taiwan (ROC).

<sup>2</sup>Precision Analysis and Materials Research Centre, National Taipei University of Technology, Taipei-106, Taiwan (ROC).

\* Correspondence: **Author:** Dr Thomas C. -K. Yang\* (ckyang@mail.ntut.edu.tw)

§These authors contributed equally to this work.

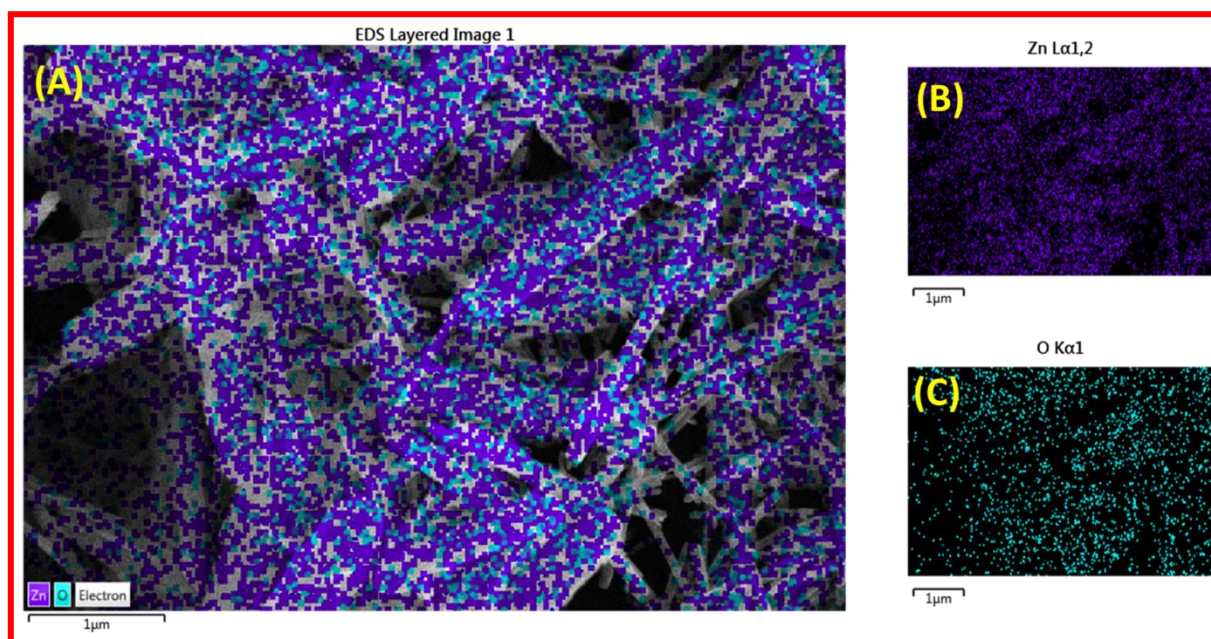

**Figure S1.** Elemental mapping image of overall ZnO-NRs (A), Zn (B), and O (C).

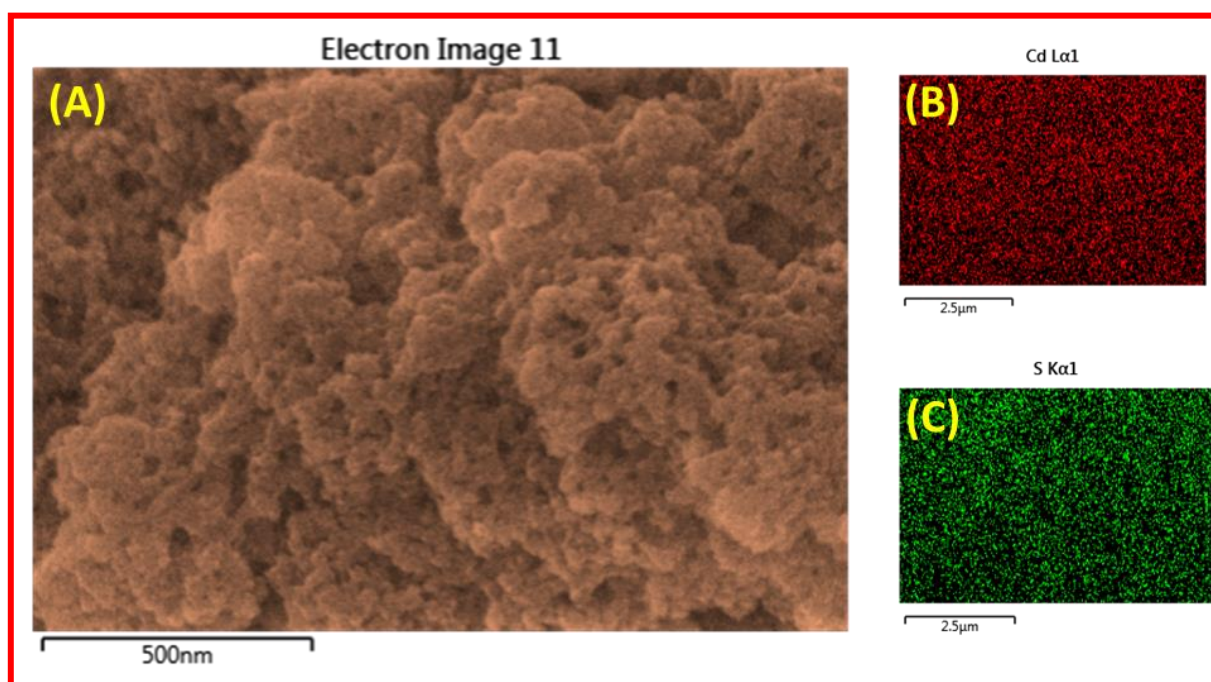

**Figure S2.** Elemental mapping image of overall CdS-NPs (A), Cd (B), and S (C).

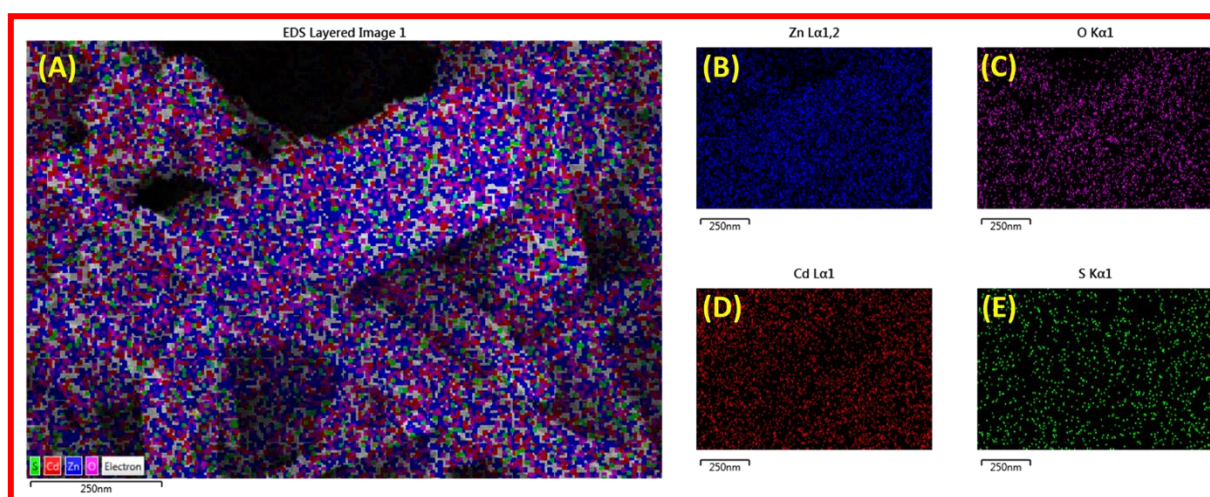

**Figure S3.** Elemental mapping image of overall CdS-NPs@ZnO-NRs (A), Zn (B), O (C), Cd (D), and S (E).

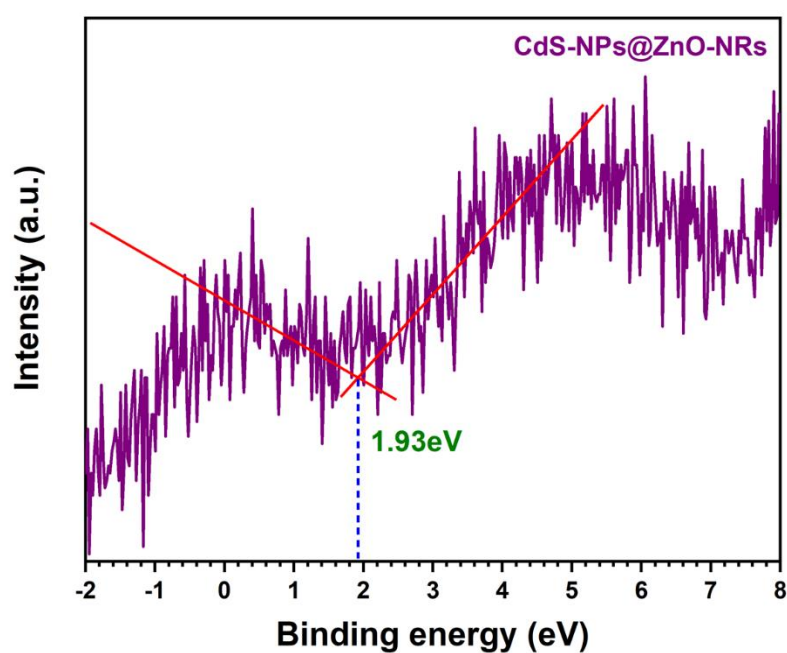

**Figure S4.** Valence band X-ray photoelectron spectrum (VB-XPS) of CdS-NPs@ZnO-NRs.

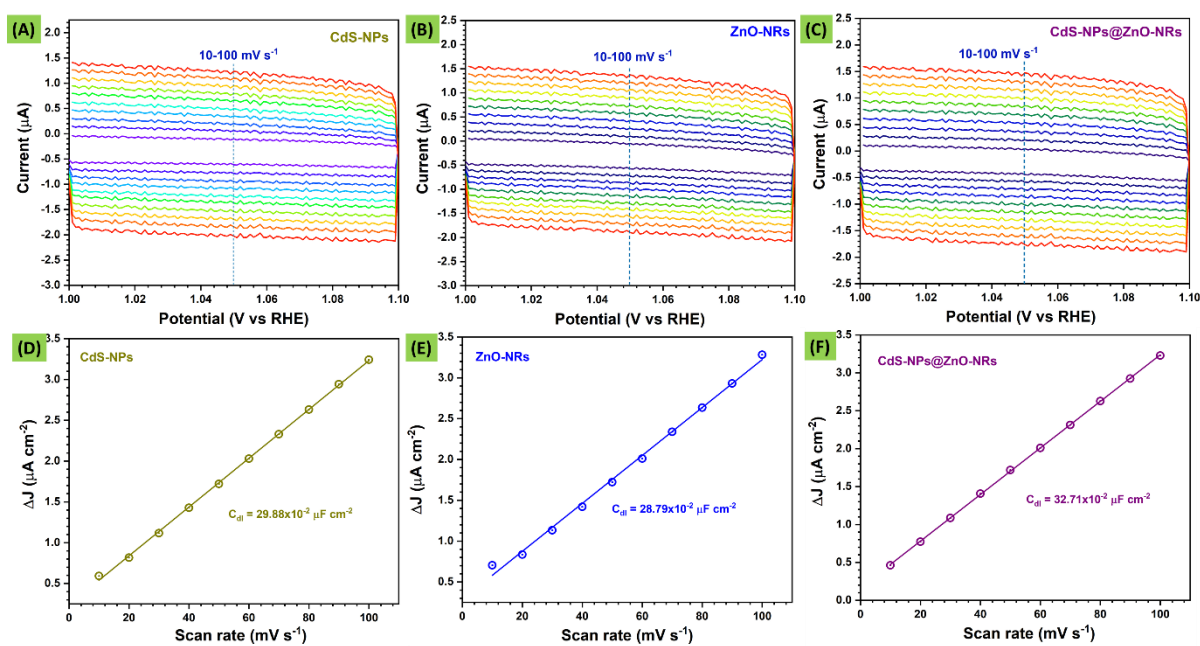

**Figure S5.** Electrochemical active surface area (ECSA) and electrochemical double layer capacitance ( $C_{dl}$ ) of CdS-NPs (A, D), and ZnO-NRs (B, E), and CdS-NPs@ZnO-NRs (C, F).
